# Supplementary material for: Neuroplasticity, Neurotransmission and Brain-Related Genes in Major Depression and Bipolar Disorder: Focus on Treatment Outcomes in an Asiatic Sample
Source: Springer Nature journal article supplement (doi:10.1007/s12325-018-0781-2), 2018-09-03
Supplement: MOESM1 [file 16093478]

| **Supplementary table 1. Trends of genetic effects on treatment outcome** | | | | | | | | | | | |
| --- | --- | --- | --- | --- | --- | --- | --- | --- | --- | --- | --- |
| **Gene** | **Variant** | **Frequencies** | **Statistical details** | | | | | | **Raw p-value** | | |
| **Response to antidepressant treatment (MDD)** | | | | | | | | | | | |
| *BDNF* | rs11030101(A/T) | T=113  not T=129 | B=-0.749; SE=0.270; OR=0.473|C.I.(0.279 - 0.802) | | | | | | 0.006 | | |
|  | rs11030104(A/G) | A=186  not A=56 | B=-0.751; SE=0.343; OR=0.472|C.I.(0.241 - 0.924) | | | | | | 0.028 | | |
|  | rs6265(A/G) | G=184  not G=58 | B=-0.816; SE=0.341; OR=0.442|C.I.(0.226 - 0.863) | | | | | | 0.017 | | |
| *CHL1* | rs2272522(C/T) | T=134  not T=107 | B=-0.537; SE=0.272; OR=0.584|C.I.(0.343 - 0.997) | | | | | | 0.049 | | |
|  | rs9841789(C/T) | C=164  not C=75 | B=-0.625; SE=0.302; OR=0.535|C.I.(0.296 - 0.968) | | | | | | 0.039 | | |
| *HOMER1* | rs10042665(C/G) | G=124  not G=117 | B=-0.805; SE=0.273; OR=0.447|C.I.(0.262 - 0.764) | | | | | | 0.003 | | |
|  | rs12514775(C/T) | T=126  not T=116 | B=-0.689; SE=0.271; OR=0.502|C.I.(0.295 - 0.854) | | | | | | 0.011 | | |
| *HTR2A* | rs643627(A/G) | G=185  not G=57 | B=0.720; SE=0.307; OR=2.055|C.I.(1.125 - 3.753) | | | | | | 0.019 | | |
| *RORA* | rs341382(C/T) | C=49  not C=193 | B=-0.695; SE=0.324; OR=0.499|C.I.(0.265 - 0.941) | | | | | | 0.032 | | |
| *S100B* | rs2186358(A/C) | C=37  not C=204 | B=0.891; SE=0.424; OR=2.436|C.I.(1.061 - 5.595) | | | | | | 0.036 | | |
|  | rs2839364(C/T) | T=37  not T=201 | B=0.874; SE=0.425; OR=2.397|C.I.(1.043 - 5.508) | | | | | | 0.040 | | |
| *WDR60* | rs2527204(C/T) | T=199  not T=43 | B=-0.818; SE=0.389; OR=0.441|C.I.(0.206 - 0.946) | | | | | | 0.035 | | |
|  | rs2657340(A/G) | A=205  not A=35 | B=-1.001; SE=0.446; OR=0.367|C.I.(0.153 - 0.881) | | | | | | 0.025 | | |
| **Remission after antidepressant treatment (MDD)** | | | | | | | | | | | |
| *CHL1* | rs2272522(C/T) | T=134  not T=107 | B=-0.629; SE=0.315; OR=0.533|C.I.(0.287 - 0.988) | | | | | | 0.046 | | |
| *CREB1* | rs6740584(C/T) | T=144  not T=97 | B=-0.704; SE=0.327; OR=0.495|C.I.(0.260 - 0.940) | | | | | | 0.032 | | |
| *GSK3B* | rs2873950(A/C) | C=176  not C=66 | B=-0.866; SE=0.388; OR=0.421|C.I.(0.197 - 0.900) | | | | | | 0.026 | | |
| *HTR2A* | rs643627(A/G) | G=185  not G=57 | B=0.899; SE=0.339; OR=2.458|C.I.(1.266 - 4.773) | | | | | | 0.008 | | |
| *NCAPG2* | rs10772(C/T) | T=182  not T=58 | B=0.675; SE=0.337; OR=1.964|C.I.(1.014 - 3.805) | | | | | | 0.045 | | |
| *RORA* | rs1020729(C/T) | C=167  not C=75 | B=-0.815; SE=0.365; OR=0.443|C.I.(0.217 - 0.905) | | | | | | 0.025 | | |
|  | rs11071570(G/T) | G=59  not G=183 | B=-0.999; SE=0.333; OR=0.368|C.I.(0.192 - 0.708) | | | | | | 0.003 | | |
|  | rs12148149(C/T) | C=38  not C=204 | B=1.028; SE=0.512; OR=2.795|C.I.(1.024 - 7.625) | | | | | | 0.045 | | |
|  | rs8041466(C/T) | T=113  not T=127 | B=-0.636; SE=0.310; OR=0.530|C.I.(0.289 - 0.972) | | | | | | 0.040 | | |
| *ST8SIA2* | rs11629679(A/C) | C=195  not C=45 | B=0.751; SE=0.374; OR=2.118|C.I.(1.019 - 4.406) | | | | | | 0.045 | | |
| **Resistance to antidepressant treatment (MDD)** | | | | | | | | | | | |
| *CHL1* | rs1516338(C/T) | C=15  not C=226 | B=-1.446; SE=0.548; OR=0.236|C.I.(0.080 - 0.690) | | | | | | 0.008 | | |
| *HTR2A* | rs1328685(A/G) | G=32  not G=209 | B=-0.954; SE=0.388; OR=0.385|C.I.(0.180 - 0.824) | | | | | | 0.014 | | |
|  | rs6311(C/T) | C=185  not C=55 | B=-0.873; SE=0.397; OR=0.418|C.I.(0.192 - 0.910) | | | | | | 0.028 | | |
|  | rs6313(C/T) | C=186  not C=55 | B=-0.865; SE=0.397; OR=0.421|C.I.(0.193 - 0.917) | | | | | | 0.029 | | |
| *RORA* | rs2553235(C/T) | C=121  not C=115 | B=0.619; SE=0.293; OR=1.857|C.I.(1.045 - 3.299) | | | | | | 0.035 | | |
|  | rs339996(C/T) | T=230  not T=10 | B=1.402; SE=0.662; OR=4.065|C.I.(1.110 - 14.888) | | | | | | 0.034 | | |
| **Response to mood stabilizers (BD)** | | | | | | | | | | | |
| *BDNF* | rs1519480(C/T) | C=47  not C=85 | B=-1.236; SE=0.417; OR=0.291|C.I.(0.128 - 0.658) | | | | | | 0.003 | | |
|  | rs7124442(C/T) | C=16  not C=116 | B=-1.595; SE=0.554; OR=0.203|C.I.(0.069 - 0.601) | | | | | | 0.004 | | |
|  | *Haplotype (rs1519480 - rs7124442)* | | | *Hap-frequency* | *Haplo-score* | | *p-value* | |  | *Sim- p-value* | |
|  | T-T | | | 0.80 | | -2.51 | | 0.012 | | | 0.007 |
|  | C-T | | | 0.13 | | 0.90 | | 0.370 | | | 0.330 |
|  | C-C | | | 0.06 | | 2.68 | | 0.010 | | | 0.060 |
| *ST8SIA2* | rs3759917(G/T) | G=101  not G=31 | B=-1.372; SE=0.645; p=0.033; OR=0.254|C.I.(0.072 - 0.898) | | | | | | 0.033 | | |
| *WDR60* | rs2788478(A/G) | A=80  not A=52 | B=0.830; SE=0.409; p=0.042; OR=2.294|C.I.(1.030 - 5.111) | | | | | | 0.042 | | |
| LEGEND: MDD, Major depressive disorder; *BD,* Bipolar disorder. See *Appendix 1 for full name of genes* | | | | | | | | | | | |

| **Supplementary table 2. Trends of associations between genetic variants and secondary outcomes (disease risk, age at onset, history of suicide attempt, psychotic features)** | | | | | | | | | | |
| --- | --- | --- | --- | --- | --- | --- | --- | --- | --- | --- |
| **Gene** | | **Variant** | **Frequencies** | **Statistical details** | | | | | | **Raw p-value** |
| **Risk (MDD)** | | | | | | | | | | |
| *CHL1* | | rs1516340(C/T) | C=469  not C=96 | B=0.569; SE=0.225; OR=1.766|C.I.(1.135 - 2.748) | | | | | | 0.012 |
| *COMT* | | rs2239393(A/G) | A=503  not A=64 | B=-0.711; SE=0.292; OR=0.491|C.I.(0.277 - 0.871) | | | | | | 0.015 |
| *HTR2A* | | rs2224721(A/C) | A=346  not A=219 | B=0.346; SE=0.175; OR=1.413|C.I.(1.004 - 1.990) | | | | | | 0.047 |
| *RORA* | | rs10519113(C/T) | T=386  not T=180 | B=-0.453; SE=0.187; OR=0.636|C.I.(0.441 - 0.917) | | | | | | 0.015 |
|  | | rs12900122(G/T) | C=549  not C=18 | B=1.028; SE=0.507; OR=2.795|C.I.(1.034 - 7.556) | | | | | | 0.043 |
|  | | rs8040067(A/T) | T=422  not T=146 | B=-0.392; SE=0.199; OR=0.675|C.I.(0.458 - 0.997) | | | | | | 0.048 |
| *SP4* | | rs2237304(A/T) | A=245  not A=323 | B=0.366; SE=0.173; OR=1.442|C.I.(1.028 - 2.023) | | | | | | 0.034 |
| *ST8SIA2* | | rs11629679(A/C) | A=350  not A=215 | B=-0.351; SE=0.177; OR=0.704|C.I.(0.497 - 0.996) | | | | | | 0.047 |
|  | | rs3784723(C/T) | T=494  not T=74 | B=0.594; SE=0.251; OR=1.811|C.I.(1.107 - 2.963) | | | | | | 0.018 |
| **Risk (BD)** | |  |  |  | | |  |  |  |  |
| BDNF | | rs11030104(A/G) | G=320  not G=137 | B=-0.493; SE=0.251; OR=0.611|C.I.(0.374 - 0.999) | | | | | | 0.049 |
|  | | rs6265(A/G) | A=321  not A=136 | B=-0.550; SE=0.253; OR=0.577|C.I.(0.352 - 0.948) | | | | | | 0.030 |
| CHL1 | | rs1516338(C/T) | C=39  not C=417 | B=-0.812; SE=0.371; p=0.029; OR=0.444|C.I.(0.215 - 0.918) | | | | | | 0.029 |
|  | | rs2272522(C/T) | C=401  not C=56 | B=0.669; SE=0.313; OR=1.951|C.I.(1.056 - 3.606) | | | | | | 0.033 |
| GSK3B | | rs1719895(C/T) | T=62  not T=395 | B=0.772; SE=0.371; OR=2.165|C.I.(1.047 - 4.477) | | | | | | 0.037 |
|  | | rs2037547(C/T) | T=60  not T=397 | B=1.009; SE=0.399; OR=2.743|C.I.(1.255 - 5.994) | | | | | | 0.011 |
| HTR2A | | rs643627(A/G) | A=337  not A=120 | B=-0.575; SE=0.271; OR=0.563|C.I.(0.330 - 0.958) | | | | | | 0.034 |
|  | | rs7997012(A/G) | A=168  not A=289 | B=0.524; SE=0.239; OR=1.689|C.I.(1.057 - 2.700) | | | | | | 0.028 |
| NCAPG2.ESYT2 | | rs9801117(C/T) | T=228  not T=229 | B=-0.550; SE=0.225; OR=0.577|C.I.(0.371 - 0.896) | | | | | | 0.014 |
| PPP3CC | | rs7430(C/G) | C=394  not C=63 | B=-0.715; SE=0.359; OR=0.489|C.I.(0.242 - 0.988) | | | | | | 0.046 |
| RORA | | rs10438338(C/T) | C=140  not C=317 | B=0.547; SE=0.251; OR=1.727|C.I.(1.057 - 2.824) | | | | | | 0.029 |
|  | | rs12913922(C/T) | C=162  not C=295 | B=-0.604; SE=0.232; OR=0.547|C.I.(0.347 - 0.861) | | | | | | 0.009 |
|  | | rs17204440(C/G) | C=179  not C=278 | B=-0.561; SE=0.227; OR=0.571|C.I.(0.366 - 0.890) | | | | | | 0.013 |
| S100B | | rs2839365(C/G) | G=418  not G=39 | B=0.937; SE=0.386; OR=2.552|C.I.(1.199 - 5.433) | | | | | | 0.015 |
| SIGMAR1 | | rs10814130(A/C) | A=269  not A=186 | B=0.529; SE=0.225; OR=1.698|C.I.(1.093 - 2.637) | | | | | | 0.018 |
| SP4 | | rs2237304(A/T) | T=425  not T=32 | B=-1.368; SE=0.638; OR=0.255|C.I.(0.073 - 0.889) | | | | | | 0.032 |
| ST8SIA2 | | rs11629679(A/C) | A=279  not A=177 | B=-0.517; SE=0.236; OR=0.597|C.I.(0.376 - 0.947) | | | | | | 0.028 |
|  | | rs3759917(G/T) | G=379  not G=78 | B=0.615; SE=0.280; OR=1.850|C.I.(1.068 - 3.203) | | | | | | 0.028 |
|  | | rs3784723(C/T) | C=269  not C=188 | B=-0.492; SE=0.232; OR=0.611|C.I.(0.388 - 0.963) | | | | | | 0.034 |
|  | | rs4777989(A/G) | G=320  not G=129 | B=-0.713; SE=0.267; OR=0.490|C.I.(0.291 - 0.827) | | | | | | 0.008 |
|  | | rs8035760(A/T) | A=280  not A=176 | B=-0.523; SE=0.236; OR=0.593|C.I.(0.374 - 0.941) | | | | | | 0.027 |
| TXNRD2 | | rs2020917(C/T) | C=412  not C=44 | B=0.710; SE=0.353; OR=2.034|C.I.(1.018 - 4.061) | | | | | | 0.044 |
|  | |  |  |  | | |  |  |  |  |
| **Age at onset (disorder)** | | |  |  | | | *Mean (SD)* |  | *Mean (SD)* |  |
| COMT (BD) | | rs4680 | A=55  not A=67 | Mann-Whitney U test | | | not A =28.7 | | A =24.0 | 0.007 |
| CREB1 (MDD) | | rs6740584 | C=198  not C=42 | B=4.860; SE=2.321; t=2.094|C.I.(0.288 - 9.432) | | | not C =43.8 (16.5) | | C =38.9 (13.0) | 0.037 |
| GSK3B (MDD) | | rs1719895 | T=32  not T=209 | Mann-Whitney U test | | | not T =40.4 | | T =35.3 | 0.048 |
|  | | rs2037547 | T=32  not T=209 | Mann-Whitney U test | | | not T =40.4 | | T =35.3 | 0.048 |
| HOMER1 (MDD) | | rs12657371 | T=98  not T=143 | Mann-Whitney U test | | | not T =41.4 | | T =37.4 | 0.045 |
| NCAPG2 (BD) | | rs10772 | C=90  not C=32 | Mann-Whitney U test | | | not C =30.0 | | C =25.4 | 0.025 |
|  | | rs877279 | G=89  not G=33 | Mann-Whitney U test | | | not G =29.9 | | G =25.3 | 0.020 |
| PPP3CC (MDD) | | rs2249098 | C=211  not C=29 | Mann-Whitney U test | | | not C =34.7 | | C =40.4 | 0.037 |
| RORA (BD) | | rs1871858 | C=24  not C=98 | Mann-Whitney U test | | | not C =25.7 | | C =30.3 | 0.026 |
| S100B (MDD) | | rs2839365 | G=222  not G=19 | Mann-Whitney U test | | | not G =32.7 | | G =40.3 | 0.015 |
|  | | rs3788266 | G=222  not G=18 | Mann-Whitney U test | | | not G =33.6 | | G =40.3 | 0.033 |
|  | | rs9722 | C=206  not C=32 | Mann-Whitney U test | | | not C =45.1 | | C =38.8 | 0.017 |
| ST8SIA2 (BD) | | rs3759917 | G=95  not G=27 | Mann-Whitney U test | | | not G =31.7 | | G =25.1 | 0.020 |
| ST8SIA2 (MDD) | | rs8035760 | A=158  not A=82 | Mann-Whitney U test | | | not A =37.4 | | A =41.1 | 0.022 |
| VIPR2 (BD) | | rs2270313 | G=112  not G=10 | Mann-Whitney U test | | | not G =35.5 | | G =25.8 | 0.011 |
| **History of suicide attempt(disorder)** | | | | | | | | | | |
| CHL1 (MDD) | | rs5993883 | G=195  not G=46 | B=-1.025; SE=0.507; OR=0.359|C.I.(0.133 - 0.969) | | | | | | 0.043 |
| ESYT2 (MDD) | | rs7997012 | A=118  not A=120 | B=0.784; SE=0.332; OR=2.191|C.I.(1.142 - 4.203) | | | | | | 0.018 |
| ESYT2, WDR60 (MDD) | | rs643627 | C=209  not C=31 | B=-1.508; SE=0.752; OR=0.221|C.I.(0.051 - 0.967) | | | | | | 0.045 |
| WDR60 (MDD) | | rs1188974 | A=54  not A=187 | B=-0.736; SE=0.349; OR=0.479|C.I.(0.242 - 0.949) | | | | | | 0.035 |
|  | *Haplotype*  (rs2788478- rs1188974) | | *Hap-frequency* | *Haplo-score* | *p-value* | | | *Sim. P-value* | | |
|  | | A-G | 0.33 | -1.75 | 0.080 | | | 0.080 | | |
|  | | G-G | 0.55 | -0.15 | 0.880 | | | 0.910 | | |
|  |  | G-A | 0.12 | 2.66 | 0.008 | | | 0.009 | | |
| GSK3B (MDD) | | rs10519113 | A=190  not A=51 | B=0.717; SE=0.355; OR=2.049|C.I.(1.022 - 4.109) | | | | | | 0.043 |
| HTR2A (BD) | | rs2224721 | A=75  not A=35 | B=-1.666; SE=0.797; OR=0.189|C.I.(0.040 - 0.902) | | | | | | 0.037 |
|  | | rs2296973 | G=90  not G=20 | B=1.152; SE=0.564; OR=3.164|C.I.(1.048 - 9.549) | | | | | | 0.041 |
| RORA (MDD) | | rs1188974 | G=186  not G=52 | B=0.720; SE=0.355; OR=2.055|C.I.(1.024 - 4.122) | | | | | | 0.043 |
| **Psychosis(disorder)** | |  |  |  | |  | | |  |  |
| BDNF(BD) | | rs11030104 | A=102  not A=28 | B=-0.874; SE=0.437; OR=0.417|C.I.(0.177 - 0.983) | | | | | | 0.046 |
|  | | rs6265 | G=102  not G=28 | B=-0.874; SE=0.437; OR=0.417|C.I.(0.177 - 0.983) | | | | | | 0.046 |
| COMT(BD) | | rs4680 | A=60  not A=70 | B=0.721; SE=0.359; OR=2.057|C.I.(1.017 - 4.161) | | | | | | 0.045 |
| RORA(BD) | | rs11071570 | G=32  not G=98 | B=-1.099; SE=0.456; OR=0.333|C.I.(0.137 - 0.814) | | | | | | 0.016 |
|  | | rs2553235 | C=67  not C=63 | B=1.110; SE=0.369; OR=3.034|C.I.(1.472 - 6.254) | | | | | | 0.003 |
| LEGEND: MDD, Major depressive disorder; BD*,* Bipolar disorder. See *Appendix 1 for full name of genes* | | | | | | | | | | |
